# Supplementary material for: Identification of an Oxidosqualene Cyclase Gene Involved in Steroidal Triterpenoid Biosynthesis in Cordyceps farinosa
Source: MDPI journal article supplement (doi:10.3390/genes12060848), 2021-05-31
Supplement: s1 [file s1]

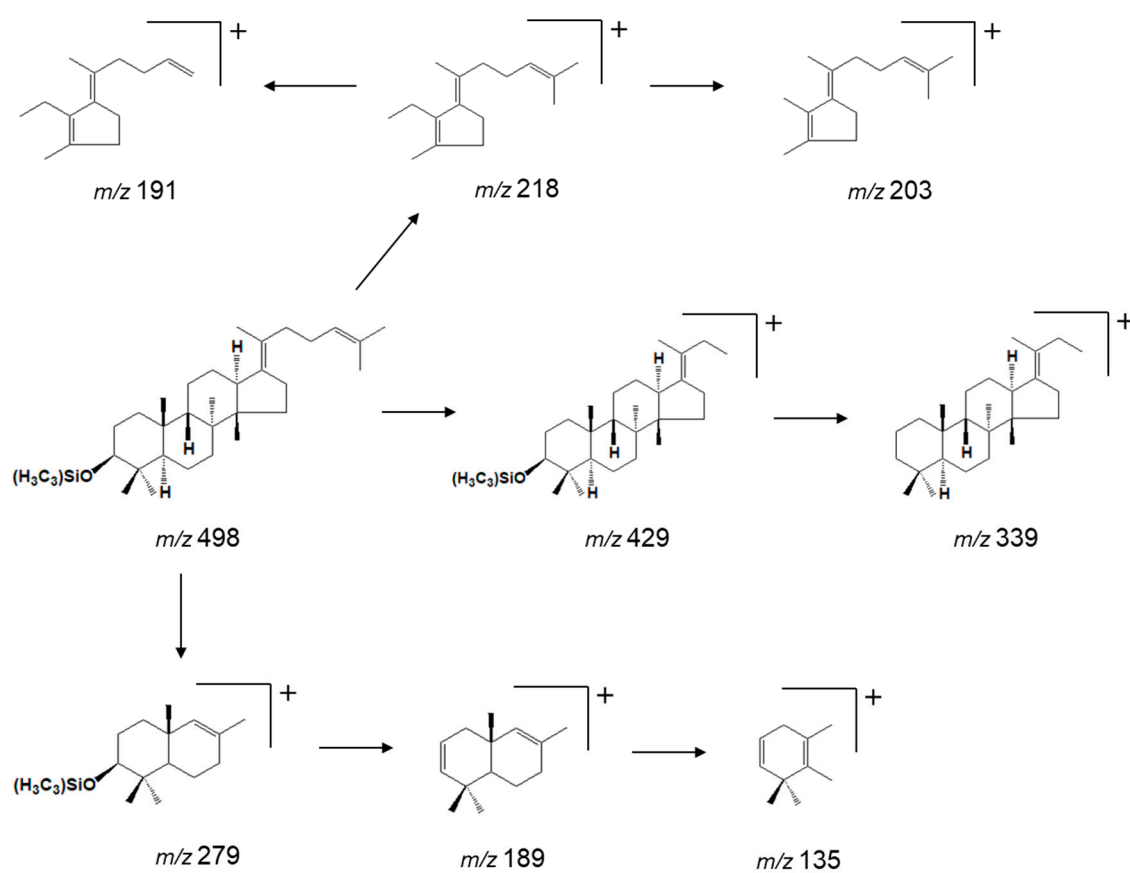

**Supplemental Figure S1.** Putative fragmentation mechanism of protostadienol leading to the characteristic fragment ions observed in the GC-MS spectrum.

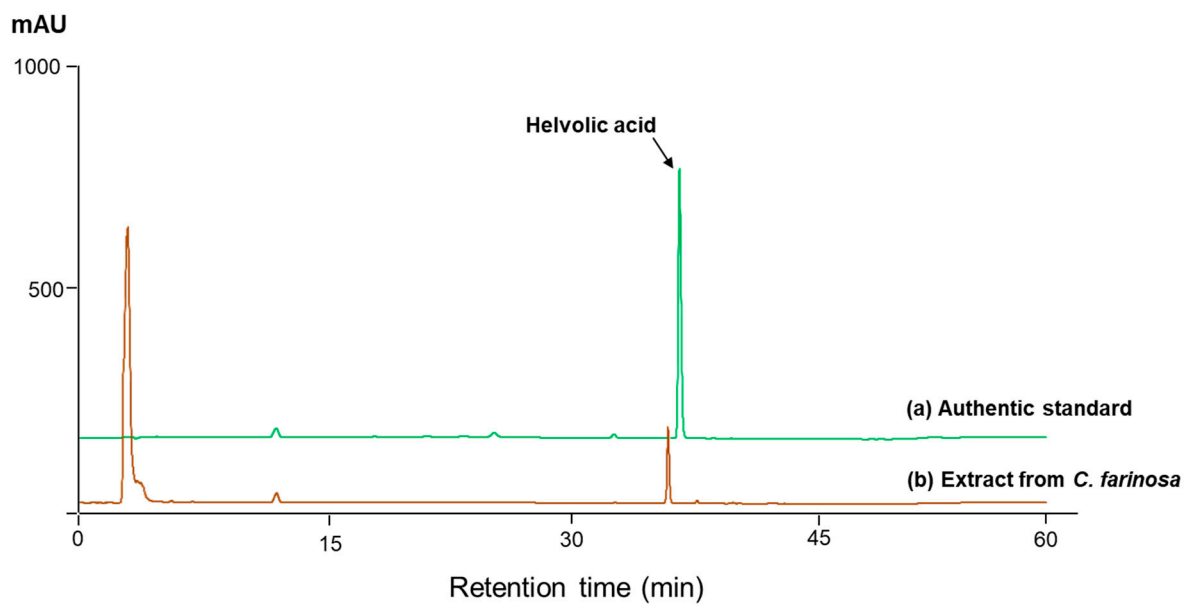

**Supplemental Figure S2.** HPLC analysis of helvolic acid. Two chromatograms of HPLC analysis, (a) an authentic helvolic acid and (b) the extract from *C. farinosa* mycelium.
